# Supplementary material
Source: PubMed Central journal article supplement (PMC3446242)
Supplement: NIHMS404461-supplement-suppl_method_1.pdf [file NIHMS404461-supplement-suppl_method_1.pdf]

ID#: \_\_\_\_\_

Date: \_\_\_\_\_

## Questionnaire #2

Instructions: Please circle a number 1-10 for the questions below.

1) How intense was the shock?

|           |   |   |   |          |   |   |   |      |    |
|-----------|---|---|---|----------|---|---|---|------|----|
| 1         | 2 | 3 | 4 | 5        | 6 | 7 | 8 | 9    | 10 |
| very mild |   |   |   | moderate |   |   |   | high |    |

2) How anxiety/fear provoking was the shock?

|     |   |   |   |          |   |   |   |      |    |
|-----|---|---|---|----------|---|---|---|------|----|
| 1   | 2 | 3 | 4 | 5        | 6 | 7 | 8 | 9    | 10 |
| low |   |   |   | moderate |   |   |   | high |    |

3) How painful was the shock?

|                    |   |   |   |                    |   |   |   |              |    |
|--------------------|---|---|---|--------------------|---|---|---|--------------|----|
| 1                  | 2 | 3 | 4 | 5                  | 6 | 7 | 8 | 9            | 10 |
| Not at all painful |   |   |   | moderately painful |   |   |   | very painful |    |
