# Supplementary material
Source: PubMed Central journal article supplement (PMC3446242)
Supplement: NIHMS404461-supplement-suppl_method_2.pdf [file NIHMS404461-supplement-suppl_method_2.pdf]

## Supplementary Methods 2

### Instructions

These instructions should be given to the subject before starting the experiment, and should be illustrated with the print out of the different conditions:

“The experiment consists of 3 conditions, 1) no shock, 2) predictable shocks, and 3) unpredictable shocks. You cannot and will not receive shocks in the no shock condition. In the predictable condition you will receive a shock only when a cue is on the screen. You will not receive a shock when the cue is absent. In the unpredictable condition you can receive a shock at any time. This means that you can receive a shock when the cue is present or absent. These 3 conditions are signaled with a note on the top of the monitor. The note “*no shock*” means that you will not receive a shock. The note “*shock only during red square*” means that you can receive a shock when the red square appears on the screen but not when the red square is absent. The note “*shock at any time*” means that you can receive shocks at any time whether the cue (the blue triangle) is present or absent. Each cue (blue triangle, red square, green circle) will be presented for 8 s at a time. You will also hear loud startling noise from time to time. These sounds are unrelated to the delivery of the shock and you can ignore them. Please try to sit still during the task and don’t move your arms and legs because this can affect our measurements. We can see you through this camera, and you can stop the experiment at any time by giving me a sign, if you decide not to continue. Do you have any questions?”
