# Supplementary material
Source: PubMed Central journal article supplement (PMC3446242)
Supplement: NIHMS404461-supplement-Suppl_Table.pdf [file NIHMS404461-supplement-Suppl_Table.pdf]

Supplementary Table 1

This table shows an example of the timing of all stimuli for a block. The table starts with 4 startle stimuli followed by the sequence PNUUNP. Note that ITI stands for inter trial interval, which refers to the period without cue.

| condition | time (sec) | time relative to previous stimulus (sec) | Cue vs ITI | Cue duration (sec) | event type    | time between startle probes (sec) | condition duration (sec) |
|-----------|------------|------------------------------------------|------------|--------------------|---------------|-----------------------------------|--------------------------|
| Hab       | 5          |                                          |            |                    | startle probe | 5                                 | 47                       |
|           | 13         | 8                                        |            |                    | startle probe | 8                                 |                          |
|           | 24         | 11                                       |            |                    | startle probe | 11                                |                          |
|           | 37         | 13                                       |            |                    | startle probe | 13                                |                          |
| P         | 47         | 10                                       | ITI        |                    | context onset |                                   | 128                      |
|           | 60         | 13                                       |            |                    | startle probe |                                   |                          |
|           | 76         | 16                                       |            |                    | Cue onset     | 22.5                              |                          |
|           | 82.5       | 6.5                                      | Cue        | 8                  | startle probe |                                   |                          |
|           | 83.5       | 1                                        |            |                    | shock         | 20.5                              |                          |
|           | 84         | 0.5                                      |            |                    | Cue offset    |                                   |                          |
|           | 103        | 19                                       | ITI        |                    | startle probe |                                   |                          |
|           | 119        | 16                                       |            |                    | Cue onset     | 20.5                              |                          |
|           | 123.5      | 4.5                                      | Cue        | 8                  | startle probe |                                   |                          |
|           | 127        | 3.5                                      |            |                    | Cue offset    | 22.5                              |                          |
|           | 146        | 19                                       | ITI        |                    | startle probe |                                   |                          |
|           | 162        | 16                                       |            |                    | Cue onset     | 22.5                              |                          |
| 168.5     | 6.5        | Cue                                      | 8          | startle probe      |               |                                   |                          |
| 170       | 1.5        |                                          |            | Cue offset         |               |                                   |                          |
| N         | 175        | 5                                        | ITI        |                    | context onset | 20                                | 124                      |
|           | 182        | 7                                        |            |                    | Cue onset     |                                   |                          |
|           | 188.5      | 6.5                                      | Cue        | 8                  | startle probe |                                   |                          |
|           | 190        | 1.5                                      |            |                    | Cue offset    | 21.5                              |                          |
|           | 210        | 20                                       | ITI        |                    | startle probe |                                   |                          |
|           | 226        | 16                                       |            |                    | Cue onset     | 20.5                              |                          |
|           | 230.5      | 4.5                                      | Cue        | 8                  | startle probe |                                   |                          |
|           | 234        | 3.5                                      |            |                    | Cue offset    | 21.5                              |                          |
|           | 252        | 18                                       | ITI        |                    | startle probe |                                   |                          |
|           | 268        | 16                                       |            |                    | Cue onset     | 20.5                              |                          |
|           | 272.5      | 4.5                                      | Cue        | 8                  | startle probe |                                   |                          |
|           | 276        | 3.5                                      |            |                    | Cue offset    | 22.5                              |                          |
| 295       | 19         | ITI                                      |            | startle probe      |               |                                   |                          |
| U         | 299        | 4                                        | ITI        |                    | context onset | 22                                | 134                      |
|           | 317        | 18                                       |            |                    | startle probe |                                   |                          |
|           | 333        | 16                                       |            |                    | Cue onset     | 20.5                              |                          |
|           | 337.5      | 4.5                                      | Cue        | 8                  | startle probe |                                   |                          |
|           | 341        | 3.5                                      |            |                    | Cue offset    | 22.5                              |                          |
|           | 342        | 1                                        | ITI        |                    | shock         |                                   |                          |
|           | 360        | 18                                       |            |                    | startle probe |                                   |                          |
|           | 378        | 18                                       |            |                    | Cue onset     | 26.5                              |                          |
|           | 384.5      | 6.5                                      | Cue        | 8                  | startle probe |                                   |                          |
|           | 386        | 1.5                                      |            |                    | Cue offset    | 21.5                              |                          |
|           | 406        | 20                                       | ITI        |                    | startle probe |                                   |                          |
|           | 422        | 16                                       |            |                    | Cue onset     | 20.5                              |                          |
| 426.5     | 4.5        | Cue                                      | 8          | startle probe      |               |                                   |                          |
| 430       | 3.5        |                                          |            | Cue offset         |               |                                   |                          |
| 432       | 2          | ITI                                      |            | shock              | 22.5          |                                   |                          |
| N         | 433        | 3                                        | ITI        |                    | context onset |                                   | 129                      |
|           | 447        | 14                                       |            |                    | startle probe |                                   |                          |
|           | 465        | 18                                       |            |                    | Cue onset     | 22.5                              |                          |
|           | 469.5      | 4.5                                      | Cue        | 8                  | startle probe |                                   |                          |
|           | 473        | 3.5                                      |            |                    | Cue offset    | 20.5                              |                          |
|           | 490        | 17                                       | ITI        |                    | startle probe |                                   |                          |
|           | 505        | 15                                       |            |                    | Cue onset     | 21.5                              |                          |
|           | 511.5      | 6.5                                      | Cue        | 8                  | startle probe |                                   |                          |
|           | 513        | 1.5                                      |            |                    | Cue offset    | 22.5                              |                          |
|           | 534        | 21                                       | ITI        |                    | startle probe |                                   |                          |
|           | 549        | 15                                       |            |                    | Cue onset     | 21.5                              |                          |
|           | 555.5      | 6.5                                      | Cue        | 8                  | startle probe |                                   |                          |
| 557       | 1.5        |                                          |            | Cue offset         |               |                                   |                          |
| U         | 562        | 5                                        | ITI        |                    | context onset | 20                                | 127                      |
|           | 569        | 7                                        |            |                    | Cue onset     |                                   |                          |
|           | 575.5      | 6.5                                      | Cue        | 8                  | startle probe |                                   |                          |
|           | 577        | 1.5                                      |            |                    | Cue offset    | 22.5                              |                          |
|           | 597        | 20                                       | ITI        |                    | startle probe |                                   |                          |
|           | 614        | 17                                       |            |                    | Cue onset     | 21.5                              |                          |
|           | 618.5      | 4.5                                      | Cue        | 8                  | startle probe |                                   |                          |
|           | 622        | 3.5                                      |            |                    | Cue offset    | 24.5                              |                          |
|           | 626        | 4                                        | ITI        |                    | shock         |                                   |                          |
|           | 643        | 17                                       |            |                    | startle probe |                                   |                          |
|           | 659        | 16                                       |            |                    | Cue onset     | 20.5                              |                          |
|           | 663.5      | 4.5                                      | Cue        | 8                  | startle probe |                                   |                          |
| 667       | 3.5        |                                          |            | Cue offset         | 20            |                                   |                          |
| 683.5     | 16.5       | ITI                                      |            | startle probe      |               |                                   |                          |
| N         | 689        | 5.5                                      | ITI        |                    | context onset | 20                                | 126                      |
|           | 699        | 10                                       |            |                    | Cue onset     |                                   |                          |
|           | 703.5      | 4.5                                      | Cue        | 8                  | startle probe |                                   |                          |
|           | 707        | 3.5                                      |            |                    | Cue offset    | 21.5                              |                          |
|           | 724        | 17                                       | ITI        |                    | startle probe |                                   |                          |
|           | 742        | 18                                       |            |                    | Cue onset     | 22                                |                          |
|           | 748.5      | 6.5                                      | Cue        | 8                  | startle probe |                                   |                          |
|           | 750        | 1.5                                      |            |                    | Cue offset    | 24                                |                          |
|           | 770        | 20                                       | ITI        |                    | startle probe |                                   |                          |
|           | 786.5      | 16.5                                     |            |                    | Cue onset     | 21                                |                          |
|           | 791        | 4.5                                      | Cue        | 8                  | startle probe |                                   |                          |
|           | 794.5      | 3.5                                      |            |                    | Cue offset    | 23                                |                          |
| 813       | 18.5       | ITI                                      |            | startle probe      |               |                                   |                          |
| P         | 815        | 2                                        | ITI        |                    | context onset | 22                                | 126                      |
|           | 828.5      | 13.5                                     |            |                    | Cue onset     |                                   |                          |
|           | 835        | 6.5                                      | Cue        | 8                  | startle probe |                                   |                          |
|           | 836.5      | 1.5                                      |            |                    | Cue offset    | 20                                |                          |
|           | 854        | 17.5                                     | ITI        |                    | startle probe |                                   |                          |
|           | 872.5      | 18.5                                     |            |                    | Cue onset     | 22                                |                          |
|           | 877        | 4.5                                      | Cue        | 8                  | startle probe |                                   |                          |
|           | 880        | 3                                        |            |                    | shock         | 20                                |                          |
|           | 880.5      | 0.5                                      |            |                    | Cue offset    |                                   |                          |
|           | 897        | 16.5                                     | ITI        |                    | startle probe |                                   |                          |
|           | 913        | 16                                       |            |                    | Cue onset     | 22.5                              |                          |
|           | 919.5      | 6.5                                      | Cue        | 8                  | startle probe |                                   |                          |
| 920.5     | 1          |                                          |            | shock              | 20.5          |                                   |                          |
| 921       | 0.5        |                                          |            | Cue offset         |               |                                   |                          |
| 940       | 19         | ITI                                      |            | startle probe      |               |                                   |                          |
| 941       |            |                                          |            | end of block 1     |               |                                   |                          |
